# Supplementary material
Source: publisher figshare collection journal article supplement (https://diabetesjournals.figshare.com/ndownloader/files/28487388)
Supplement: Supplementary file 1 [file 28487388]

# ONLINE-ONLY SUPPLEMENTAL MATERIAL

Supplemental Table S1. Comparison of baseline characteristics between noneligible patients or patients declining participation and included patients

|                                        | Screened<br>n=848 | Noneligible<br>n=251        | Declined participation<br>n=240*/102 <sup>†</sup> | Included<br>n=357 |
|----------------------------------------|-------------------|-----------------------------|---------------------------------------------------|-------------------|
| Age                                    |                   |                             |                                                   |                   |
| Years                                  | 50±17             | 52±20 (p<0.01)              | 51±16 (p<0.05)                                    | 48±14             |
| <50 years, n (%)                       | 400 (47)          | 110 (44) (NS <sup>‡</sup> ) | 107 (45) (NS <sup>‡</sup> )                       | 183 (51)          |
| Female sex, n (%)                      | 339 (40)          | 111 (44) (NS <sup>‡</sup> ) | 97 (40) (NS <sup>‡</sup> )                        | 131 (37)          |
| Disease duration                       |                   |                             |                                                   |                   |
| Years                                  |                   |                             | 28.3±16.9 (p<0.01§)                               | 22.5±14.4         |
| ≤ 5 years, n (%)                       |                   |                             | 7 (7) (NS <sup>‡</sup> )                          | 43 (12)           |
| Insulin pump use <sup>  </sup> , n (%) |                   |                             | 17 (17) (NS <sup>‡</sup> )                        | 62 (17)           |
| HbA1c                                  |                   |                             |                                                   |                   |
| %                                      |                   |                             | 7.5±1.0 (NS)                                      | 7.6±0.9           |
| mmol/mol                               |                   |                             | 58.5±10.5                                         | 59.7±10.2         |
| LDL cholesterol, mmol/l                |                   |                             | 2.4±0.8 (NS)                                      | 2.5±0.7           |
| eGFR, ml/min                           |                   |                             | 110±38 (NS)                                       | 119±45            |
| Blood pressure, mmHg                   |                   |                             |                                                   |                   |
| Systolic                               |                   |                             | 131±13 (NS)                                       | 132±14            |
| Diastolic                              |                   |                             | 73±10 (p<0.01)                                    | 76±9              |
| Body weight, kg                        |                   |                             | 81±17 (NS)                                        | 83±16             |
| BMI, kg/m <sup>2</sup>                 |                   |                             | 26.0±4.6 (p<0.05)                                 | 27.2±4.6          |
| uACR, n (%)                            |                   |                             |                                                   |                   |
| Normoalbuminuria                       |                   |                             | 49 (85)                                           | 286 (84)          |
| Microalbuminuria                       |                   |                             | 7 (12)                                            | 42 (12)           |
| Macroalbuminuria                       |                   |                             | 2 (3) (NS <sup>¶</sup> )                          | 14 (4)            |
| Retinopathy, n (%)                     |                   |                             |                                                   |                   |
| Normal                                 |                   |                             | 35 (49)                                           | 163 (46)          |
| Nonproliferative                       |                   |                             | 31 (43)                                           | 138 (39)          |
| Proliferative or laser treated         |                   |                             | 6 (8) (NS <sup>‡</sup> )                          | 54 (15)           |

Data are represented as mean±SD and were analyzed with the t test unless otherwise indicated.

\*All patients who declined participation (only sex and age collected); <sup>†</sup>patients who declined participation but granted access to medical records.

<sup>‡</sup>Chi-squared test; <sup>§</sup>Wilcoxon rank-sum test (Mann–Whitney); <sup>||</sup>Pump or injection; <sup>¶</sup>Fisher's

exact test.

eGFR, estimated glomerular filtration rate; HbA1c, glycated hemoglobin; NS, nonsignificant;

uACR, urine albumin-to-creatinine ratio.

Supplemental Table S2. Comparison of baseline characteristics between patients who completed the study (per protocol) and dropouts

|                         | All included |                                  | Intervention |                                  | Control      |                              |
|-------------------------|--------------|----------------------------------|--------------|----------------------------------|--------------|------------------------------|
|                         | Per protocol | Dropouts                         | Per protocol | Dropouts                         | Per protocol | Dropouts                     |
|                         | n=322        | n=35                             | n=153        | n=25                             | n=169        | n=10                         |
| Age                     |              |                                  |              |                                  |              |                              |
| Years                   | 49±13        | 40±16 (p<0.001)                  | 48±14        | 41±17 (p<0.05)                   | 49±13        | 38±15 (p<0.05)               |
| <50 years, n (%)        | 159 (49)     | 24 (69) (p<0.05*)                | 82 (54)      | 17 (68) (NS*)                    | 77 (46)      | 7 (70) (NS*)                 |
| Female sex, n (%)       | 113 (35)     | 18 (5) (NS*)                     | 58 (38)      | 11 (44) (NS*)                    | 55 (33)      | 7 (70) (p<0.05*)             |
| Disease duration        |              |                                  |              |                                  |              |                              |
| Years                   | 23.0±14.4    | 17.5±10.8 (p<0.05 <sup>†</sup> ) | 22.8±13.9    | 17.1±10.9 (p<0.05 <sup>†</sup> ) | 23.2±14.9    | 18.5±11.1 (NS <sup>†</sup> ) |
| ≤ 5 years, n (%)        | 40 (12)      | 3 (9) (NS*)                      | 17 (11)      | 2 (8) (NS*)                      | 23 (14)      | 1 (10) (NS*)                 |
| HbA1c                   |              |                                  |              |                                  |              |                              |
| %                       | 7.6±0.9      | 7.4±0.9 (NS)                     | 7.7±1.0      | 7.2±0.8 (p<0.05)                 | 7.6±0.9      | 7.9±0.9 (NS)                 |
| mmol/mol                | 59.9±10.2    | 57.6±9.6                         | 60.3±10.6    | 55.5±9.1                         | 59.5±9.8     | 62.4±9.6                     |
| LDL cholesterol, mmol/l | 2.5±0.7      | 2.6±0.8 (NS)                     | 2.5±0.7      | 2.5±0.7 (NS)                     | 2.5±0.8      | 2.7±1.3 (NS)                 |
| Insulin pump use, n (%) | 52 (16)      | 10 (29) (NS*)                    | 25 (16)      | 6 (24) (NS*)                     | 27 (16)      | 4 (40) (NS*)                 |
| Blood pressure, mmHg    |              |                                  |              |                                  |              |                              |
| Systolic                | 132±14       | 129±18 (NS)                      | 133±12       | 130±19 (NS)                      | 132±15       | 126±14 (NS)                  |
| Diastolic               | 76±9         | 74±10 (NS)                       | 77±8         | 73±11 (NS)                       | 76±9         | 76±5 (NS)                    |
| Body weight, kg         | 84±16        | 76±13 (p<0.005)                  | 85±16        | 77±13 (p<0.05)                   | 84±16        | 73±13 (p<0.05)               |
| BMI, kg/m <sup>2</sup>  | 27.4±4.7     | 25.6±3.9 (p<0.05)                | 27.7±4.7     | 25.4±2.5 (p<0.05)                | 27.1±4.6     | 25.0±6.3 (NS)                |

Data represent mean $\pm$ SD and were analyzed with the t test unless otherwise indicated.

\*Chi-squared test; <sup>†</sup>Wilcoxon rank-sum test (Mann–Whitney).

Supplemental Table S3. Patient preferences for patient-initiated setup vs. routine physician-initiated visits and subgroup analysis by sex and age\*

|                                                                 | Intervention                 | Within<br>group<br>difference <sup>†</sup> | Control                       | Within<br>group<br>difference <sup>†</sup> | Between-<br>group<br>difference <sup>†</sup> |
|-----------------------------------------------------------------|------------------------------|--------------------------------------------|-------------------------------|--------------------------------------------|----------------------------------------------|
| Patient-initiated vs. routine physician-initiated visits, n (%) | 82 (58) vs. 60 (42)<br>n=142 |                                            | 27 (20) vs. 109 (80)<br>n=136 |                                            | p<0.001                                      |
| Female                                                          | 35 (67) vs. 17 (33)<br>n=52  | NS                                         | 10 (24) vs. 32 (76)<br>n=42   | NS                                         | p<0.001                                      |
| Male                                                            | 47 (52) vs. 43 (48)<br>n=90  |                                            | 17 (18) vs. 77 (82)<br>n=94   |                                            | p<0.001                                      |
| Age <50                                                         | 50 (64) vs. 28 (36)<br>n=78  | NS                                         | 32 (59) vs. 32 (50)<br>n=64   | p<0.05                                     | p<0.001                                      |
| Age ≥50                                                         | 19 (30) vs. 45 (70)<br>n=64  |                                            | 8 (11) vs. 64 (89)<br>n=72    |                                            | p<0.001                                      |

\*Patients who completed the trial were asked at the end of trial about their preference for scheduling visits to the outpatient clinic.

<sup>†</sup>Data were analyzed with the chi-squared test.

Supplemental Table S4. Patient-reported experience outcomes and subgroup analysis by sex and age\*<sup>†</sup>

|               | Sex                                            | Between-group difference | Age (years) | Between-group difference |
|---------------|------------------------------------------------|--------------------------|-------------|--------------------------|
| Benefit       | S1                                             | Female                   | <50         | NS                       |
|               |                                                | Male                     | ≥50         | NS                       |
|               | S2                                             | Female                   | <50         | p<0.01                   |
|               |                                                | Male                     | ≥50         | NS                       |
|               | S3                                             | Female                   | <50         | NS                       |
|               |                                                | Male                     | ≥50         | p<0.05                   |
| Accessibility | S4                                             | Female                   | <50         | p<0.05                   |
|               |                                                | Male                     | ≥50         | NS                       |
|               | S5                                             | Female                   | <50         | p<0.01                   |
|               |                                                | Male                     | ≥50         | p<0.05                   |
|               | S6                                             | Female                   | <50         | p<0.001                  |
|               |                                                | Male                     | ≥50         | p<0.05                   |
|               | S7                                             | Female                   | <50         | p<0.01                   |
|               |                                                | Male                     | ≥50         | NS                       |
|               | Overall 7 item satisfaction score <sup>‡</sup> | Female                   | <50         | p<0.001                  |
|               |                                                | Male                     | ≥50         | p<0.05                   |

\*Subgroup analysis for patient-reported experience measures from Table 2. Likert scores were analyzed by multilevel mixed-effects ordered logistic regression.

<sup>†</sup>Number of patients (baseline/end of trial): intervention group, females=69/58, males=108/94, <50 years=99/82, ≥50 years=79/71; control group, females=62/54, males=117/111, <50 years=84/77, ≥50 years=95/92.

<sup>‡</sup>Sum scores was analyzed by mixed-model multilevel mixed-effects linear regression.

Supplemental Table S5. Patient-reported experience measures for patient involvement, patient empowerment and diabetes distress at baseline and at the end of the trial\*†

| Item‡§              | Intervention |              |                              | Control    |              |                              | P value<br>(between<br>groups) |
|---------------------|--------------|--------------|------------------------------|------------|--------------|------------------------------|--------------------------------|
|                     | Baseline     | End of trial | P value<br>(within<br>group) | Baseline   | End of trial | P value<br>(within<br>group) |                                |
| Patient involvement |              |              |                              |            |              |                              |                                |
| S8                  | 4.33±0.66    | 4.44±0.62    | NS                           | 4.39±0.66  | 4.29±0.67    | p<0.05                       | p<0.05                         |
| Empowerment         |              |              |                              |            |              |                              |                                |
| S9                  | 4.02±0.70    | 3.99±0.81    | NS                           | 4.08 ±0.68 | 3.98±0.69    | NS                           | NS                             |
| S10                 | 4.11±0.72    | 4.17±0.66    | NS                           | 4.15±0.68  | 4.07±0.63    | NS                           | NS                             |
| S11                 | 4.21±0.58    | 4.25±0.58    | NS                           | 4.25±0.58  | 4.15±0.67    | NS                           | NS                             |
| S12                 | 4.07±0.66    | 4.11±0.68    | NS                           | 4.21±0.64  | 4.05±0.64    | p<0.01                       | NS                             |
| Diabetes distress   |              |              |                              |            |              |                              |                                |
| S13                 | 3.52±1.11    | 3.39±1.16    | NS                           | 3.50±1.07  | 3.43±1.17    | NS                           | NS                             |
| S14                 | 3.95±0.91    | 3.94±0.94    | NS                           | 3.91±0.96  | 3.88±1.00    | NS                           | NS                             |

Data are presented as mean±SD.

\*Number of patients replying to the questionnaires at baseline/end of trial: intervention group, 177/152; control group, 179/165.

†Patient-reported experience were measured on a 5-point Likert scale (1=strongly disagree to 5=strongly agree); scores were analyzed by multilevel mixed-effects ordered logistic regression.

‡S8, I feel that I am involved in decisions about my treatment at the visits; S9, I feel I am able to manage my diabetes treatment; S10, I am satisfied with my knowledge of diabetes; S11, I am confident that I can understand and manage my measurements and symptoms; S12, I know

how to prevent diabetes complications; S13, I worry about having too low or too high blood sugar levels; S14, I worry about getting complications later in life due to diabetes.

<sup>§</sup>Intraclass correlation coefficient (ICC) (two-way random-effects model) scores for the items of S8=0.72, S9=0.47, S10=0.62, S11=0.68, S12=0.53, S13=0.54, and S14=0.62.

NS, nonsignificant.

Supplemental Table S6. HbA1c level at baseline and at the end of the trial and subgroup analysis by sex\*<sup>†</sup>

|                 | Intervention |              |                         | Control   |              |                         | Between-group difference |
|-----------------|--------------|--------------|-------------------------|-----------|--------------|-------------------------|--------------------------|
|                 | Baseline     | End of trial | Within-group difference | Baseline  | End of trial | Within-group difference |                          |
| Female          |              |              |                         |           |              |                         |                          |
| HbA1c, %        | 7.6±1.0      | 7.8±1.0      | NS                      | 7.5±0.7   | 7.5±0.8      | NS                      | NS                       |
| HbA1c, mmol/mol | 59.8±10.9    | 62.0±11.2    | NS                      | 58.2±8.1  | 58.0±8.8     | NS                      | NS                       |
| Male            |              |              |                         |           |              |                         |                          |
| HbA1c, %        | 7.6±0.9      | 7.6±1.1      | NS                      | 7.7±1.0   | 7.6±1.0      | NS                      | NS                       |
| HbA1c, mmol/mol | 59.6±10.3    | 59.5±11.6    | NS                      | 60.4±10.5 | 60.1±10.8    | NS                      | NS                       |
| <50 years       |              |              |                         |           |              |                         |                          |
| HbA1c, %        | 7.6±1.0      | 7.7±1.0      | NS                      | 7.7 ±0.9  | 7.7 ±0.9     | NS                      | NS                       |
| HbA1c, mmol/mol | 59.9±10.5    | 60.3±10.9    | NS                      | 60.3±9.8  | 60.9±9.8     | NS                      | NS                       |
| ≥50 years       |              |              |                         |           |              |                         |                          |
| HbA1c, %        | 7.6±1.0      | 7.7±1.12     | NS                      | 7.7±0.9   | 7.6±1.0      | NS                      | NS                       |
| HbA1c, mmol/mol | 59.3±10.6    | 60.7±12.2    | NS                      | 59.1±9.8  | 58.1±10.5    | NS                      | NS                       |

\*HbA1c levels are reported as mean±SD; changes were analyzed by mixed-model multilevel regression.

<sup>†</sup>Number of patients (ie, HbA1c samples) (baseline/end of trial): intervention group, females=69/58, males=108/95, <50 years=98/82, ≥50 years=79/71; control group, females=61/55, males=116/114, <50 years=82/77, ≥50 years=95/92.

HbA1c, glycated hemoglobin; NS, nonsignificant.

Supplemental Table S7. All HbA1c samples in the study period (from baseline to the final visit)

|                                                   | Intervention<br>n=174 | Control<br>n=175 | Between-group<br>difference |
|---------------------------------------------------|-----------------------|------------------|-----------------------------|
| HbA1c (all samples)                               |                       |                  |                             |
| %                                                 | 7.6±0.9               | 7.6±0.8          | NS*                         |
| mmol/mol                                          | 60.1±10.1             | 59.2±8.7         | NS*                         |
| Number of all HbA1c samples, mean±SD <sup>†</sup> | 5.8±2.1               | 6.5±1.8          | p<0.05 <sup>‡</sup>         |
| Number of samples above HbA1c threshold           |                       |                  |                             |
| >8.6 % (70 mmol/mol), n                           | 148                   | 137              | NS <sup>§</sup>             |
| >9.5% (80 mmol/mol), n                            | 51                    | 35               | NS <sup>§</sup>             |
| >10.4% (90 mmol/mol), n                           | 7                     | 11               | NS <sup>§</sup>             |

\*Multiple linear regression weighted for number of measurements.

<sup>†</sup>Mean±SD weighted for time in the trial.

<sup>‡</sup>Poisson regression controlled for exposure time in the trial.

<sup>§</sup>Poisson regression with weighted analyses based on probability weights of the number of measurements and controlled for exposure time in the trial.

HbA1c, glycated hemoglobin; NS, nonsignificant.

Supplemental Table S8. Number of contacts with the outpatient clinic during the study period (from enrollment to the final visit) and subgroup analysis by sex\*†

| Use of resources per patient                                      | Intervention<br>n=178         |                                | Control<br>n=179              |                                | Between-<br>group<br>difference |
|-------------------------------------------------------------------|-------------------------------|--------------------------------|-------------------------------|--------------------------------|---------------------------------|
|                                                                   | Mean<br>number of<br>contacts | Total<br>number of<br>contacts | Mean<br>number of<br>contacts | Total<br>number of<br>contacts |                                 |
| All visits to outpatient clinic (physician, nurse, and dietician) | 4.4±2.8                       | 754                            | 6.3±2.7                       | 1120                           | p<0.001                         |
| Female                                                            | 5.1±2.6                       |                                | 6.4±2.9                       |                                | p<0.05                          |
| Male                                                              | 3.9±2.8                       |                                | 6.3±2.7                       |                                | p<0.001                         |
| <50 years                                                         | 4.4±2.8                       |                                | 6.5±3.1                       |                                | p<0.001                         |
| ≥50 years                                                         | 4.4±2.7                       |                                | 6.2±2.4                       |                                | p<0.001                         |
| Outpatient visits (endocrinology specialist physician)            | 1.7±1.0                       | 281                            | 2.6±0.6                       | 452                            | p<0.001                         |
| Female                                                            | 1.8±0.9                       |                                | 2.5±0.6                       |                                | p<0.01                          |
| Male                                                              | 1.6±1.0                       |                                | 2.6±0.6                       |                                | p<0.001                         |
| <50 years                                                         | 1.6±1.0                       |                                | 2.5±0.6                       |                                | p<0.001                         |
| ≥50 years                                                         | 1.8±1.0                       |                                | 2.6±0.6                       |                                | p<0.001                         |
| Outpatient visits (specialist diabetes nurse)                     | 2.3±2.2                       | 398                            | 3.2±2.0                       | 571                            | p<0.001                         |
| Female                                                            | 2.8±2.2                       |                                | 3.0±1.9                       |                                | NS                              |
| Male                                                              | 1.9±2.1                       |                                | 3.3±2.1                       |                                | p<0.001                         |
| <50 years                                                         | 2.3±2.3                       |                                | 3.4±2.1                       |                                | p<0.001                         |
| ≥50 years                                                         | 2.3±2.0                       |                                | 3.1±1.9                       |                                | p<0.05                          |
| Outpatient visits (dietician)                                     | 0.4±1.0                       | 75                             | 0.6±1.3                       | 97                             | NS                              |
| Female                                                            | 0.5±0.9                       |                                | 0.8±1.5                       |                                | NS                              |
| Male                                                              | 0.4±1.1                       |                                | 0.4±1.2                       |                                | NS                              |
| <50 years                                                         | 0.5±1.1                       |                                | 0.6±1.5                       |                                | NS                              |
| ≥50 years                                                         | 0.4±1.0                       |                                | 0.5±1.1                       |                                | NS                              |
| Phone calls (physician, nurse, and dietician)‡                    | 3.1±3.4                       | 532                            | 2.5±3.2                       | 449                            | p<0.01                          |
| Female                                                            | 4.1±4.0                       |                                | 2.8±3.6                       |                                | p<0.001                         |

|                                |         |    |         |    |         |
|--------------------------------|---------|----|---------|----|---------|
| Male                           | 2.5±2.8 |    | 2.3±3.1 |    | NS      |
| <50 years                      | 3.2±3.7 |    | 2.9±3.3 |    | NS      |
| ≥50 years                      | 2.9±3.1 |    | 2.2±3.2 |    | p<0.05  |
| Lost appointments <sup>§</sup> | 0.3±0.7 | 52 | 0.6±1.1 | 98 | p<0.05  |
| Female                         | 0.2±0.5 |    | 0.3±0.7 |    | NS      |
| Male                           | 0.3±0.8 |    | 0.7±1.3 |    | p<0.001 |
| <50 years                      | 0.3±0.7 |    | 0.9±1.4 |    | p<0.001 |
| ≥50 years                      | 0.3±0.6 |    | 0.3±0.7 |    | NS      |

\*Mean±SD for the number of visits were weighted for time in the trial; data were analyzed by Poisson analysis controlled for exposure time in the trial.

<sup>†</sup>Patient numbers (baseline/end of trial): intervention group, females=69/58, males=109/95, <50 years=98/82, ≥50 years=79/71; control group, females=62/55, males=117/114, <50 years=82/77, ≥50 years=95/92.

<sup>‡</sup>91 % of the phone calls in both the intervention group and the control group were with a nurse.

<sup>§</sup>Number of lost appointments includes no-shows and late cancellations (within 1 day).

NS, nonsignificant.

Supplemental Table S9. Frequency distribution of visits to the outpatient clinic during the study period for all patients who completed the trial and subgroup analysis by sex\*

| Total number of outpatient visits | Intervention |                |              | Control   |                |               |
|-----------------------------------|--------------|----------------|--------------|-----------|----------------|---------------|
|                                   | N=153        | Female<br>N=58 | Male<br>N=95 | N=169     | Female<br>N=55 | Male<br>N=114 |
|                                   | n (%)        | n (%)          | n (%)        | n (%)     | n (%)          | n (%)         |
| 0                                 | 0            | 0              | 0            | 0         | 0              | 0             |
| 1                                 | 19 (12.4)    | 5 (8.6)        | 14 (14.7)    | 0         | 0              | 0             |
| 2                                 | 23 (15.0)    | 4 (6.9)        | 19 (20.0)    | 1 (0.6)   | 0              | 1 (0.9)       |
| 3                                 | 23 (15.0)    | 7 (12.1)       | 16 (16.8)    | 7 (4.1)   | 1 (1.8)        | 6 (5.3)       |
| 4                                 | 23 (15.0)    | 9 (15.5)       | 14 (14.7)    | 34 (20.1) | 16 (29.1)      | 18 (15.8)     |
| 5                                 | 14 (9.2)     | 8 (13.8)       | 6 (6.3)      | 41 (24.3) | 7 (12.7)       | 34 (29.8)     |
| 6                                 | 15 (9.8)     | 6 (10.3)       | 9 (9.5)      | 22 (13.0) | 7 (12.7)       | 15 (13.2)     |
| 7                                 | 14 (9.2)     | 10 (17.2)      | 4 (4.2)      | 17 (10.1) | 7 (12.7)       | 10 (8.8)      |
| 8                                 | 12 (7.8)     | 7 (12.1)       | 5 (5.3)      | 15 (8.9)  | 6 (10.9)       | 9 (7.9)       |
| 9                                 | 2 (1.3)      | 0              | 2 (2.1)      | 14 (8.3)  | 4 (7.3)        | 10 (8.8)      |
| 10                                | 3 (2.0)      | 0              | 3 (3.2)      | 8 (4.7)   | 5 (9.1)        | 3 (2.6)       |
| 11                                | 3 (2.0)      | 2 (3.5)        | 1 (1.1)      | 2 (1.2)   | 0              | 2 (1.8)       |
| 12                                | 1 (0.7)      | 0              | 1 (1.1)      | 3 (1.8)   | 0              | 3 (2.6)       |
| 13                                | 1 (0.7)      | 0              | 1 (1.1)      | 1 (0.6)   | 0              | 1 (0.9)       |
| 14                                | 0            | 0              | 0            | 1 (0.6)   | 1 (1.8)        | 0             |
| 15                                | 0            | 0              | 0            | 0         | 0              | 0             |
| 16                                | 0            | 0              | 0            | 1 (0.6)   | 0              | 1 (0.9)       |
| 17                                | 0            | 0              | 0            | 1 (0.6)   | 0              | 1 (0.9)       |
| 18                                | 0            | 0              | 0            | 1 (0.6)   | 1 (1.8)        | 0             |

\*Number of participants who completed the trial (N) and had any number of visits during the trial period, including visits with a physician, nurse, or dietician.
